# Supplementary material for: Response of Thymus lotocephalus In Vitro Cultures to Drought Stress and Role of Green Extracts in Cosmetics
Source: MDPI journal article supplement (doi:10.3390/antiox11081475), 2022-07-28
Supplement: s1 [file s1]

## **Response of *Thymus lotocephalus* in vitro cultures to drought stress and role of green extracts in cosmetics**

Inês Mansinhos<sup>1</sup>, Sandra Gonçalves<sup>1</sup>, Raquel Rodríguez-Solana<sup>1,2</sup>, Hugo Duarte<sup>1</sup>, José Luis Ordóñez-Díaz<sup>2</sup>, José Manuel Moreno-Rojas<sup>2</sup> and Anabela Romano<sup>1,\*</sup>

<sup>1</sup>*MED – Mediterranean Institute for Agriculture, Environment and Development & CHANGE – Global Change and Sustainability Institute, Faculdade de Ciências e Tecnologia, Universidade do Algarve, Campus de Gambelas, 8005-139 Faro, Portugal*

<sup>2</sup> *Department of Food Science and Health, Andalusian Institute of Agricultural and Fisheries Research and Training (IFAPA), Avenida Menendez-Pidal, SN, 14004 Córdoba, Spain*

*\* Correspondence: [aromano@ualg.pt](mailto:aromano@ualg.pt); Tel.: +351289800910*

## Supplementary information

**Table S1.** HPLC-HRMS data of identified phenolics in *Thymus lotocephalus* López and Morales extracts.

| Peak | Compound identity                                                 | Chemical formula                                | Theoretical exact mass [M-H] <sup>-</sup> ( <i>m/z</i> ) | Delta ppm (error) | RT (min) | MSI MI level* |
|------|-------------------------------------------------------------------|-------------------------------------------------|----------------------------------------------------------|-------------------|----------|---------------|
| 1    | Methyl 6-O-galloyl-β-D-glucopyranoside <sup>a, 1</sup>            | C <sub>14</sub> H <sub>18</sub> O <sub>10</sub> | 345.0793                                                 | -5.81             | 2.64     | 2             |
| 2    | Protocatechuic aldehyde <sup>d, 2</sup>                           | C <sub>7</sub> H <sub>6</sub> O <sub>3</sub>    | 137.0239                                                 | 0.07              | 3.96     | 2             |
| 3    | Caffeic acid <sup>a</sup>                                         | C <sub>9</sub> H <sub>8</sub> O <sub>4</sub>    | 179.0338                                                 | -0.14             | 4.81     | 1             |
| 4    | Epigallocatechin gallate <sup>b</sup>                             | C <sub>22</sub> H <sub>18</sub> O <sub>11</sub> | 457.0765                                                 | 0.27              | 5.34     | 1             |
| 5    | Salvianolic acid C <sup>a, 3</sup>                                | C <sub>18</sub> H <sub>17</sub> O <sub>9</sub>  | 377.0873                                                 | -0.74             | 5.37     | 2             |
| 6    | Dihydromorelloflavone <sup>b, 4</sup>                             | C <sub>30</sub> H <sub>22</sub> O <sub>11</sub> | 557.1083                                                 | 0.13              | 5.37     | 2             |
| 7    | Salviaflaside <sup>a, 3</sup>                                     | C <sub>24</sub> H <sub>26</sub> O <sub>13</sub> | 521.1288                                                 | 0.12              | 8.1      | 2             |
| 8    | Luteolin-7-O-glucuronide <sup>b, 5</sup>                          | C <sub>21</sub> H <sub>18</sub> O <sub>12</sub> | 461.0714                                                 | -0.03             | 8.67     | 2             |
| 9    | Salvianolic acid B /Salvianolic acid L isomer I <sup>a, 3</sup>   | C <sub>36</sub> H <sub>30</sub> O <sub>16</sub> | 717.1456                                                 | -2.62             | 9.22     | 2             |
| 10   | Rosmarinic acid <sup>a</sup>                                      | C <sub>18</sub> H <sub>16</sub> O <sub>8</sub>  | 359.0761                                                 | 0.77              | 10       | 1             |
| 11   | Theaflavic acid <sup>b, 6</sup>                                   | C <sub>21</sub> H <sub>16</sub> O <sub>10</sub> | 427.0636                                                 | -5.28             | 10.04    | 2             |
| 12   | Sagerinic acid <sup>a, 3</sup>                                    | C <sub>36</sub> H <sub>32</sub> O <sub>16</sub> | 719.1612                                                 | -1.21             | 10.07    | 2             |
| 13   | Salvianolic acid A isomer I <sup>a, 3</sup>                       | C <sub>26</sub> H <sub>22</sub> O <sub>10</sub> | 493.1129                                                 | -0.76             | 10.6     | 2             |
| 14   | Salvianolic acid A isomer II <sup>a, 3</sup>                      | C <sub>26</sub> H <sub>22</sub> O <sub>10</sub> | 493.1129                                                 | 0.36              | 11.47    | 2             |
| 15   | Melitric acid A / Salvianolic acid I <sup>a, 3</sup>              | C <sub>27</sub> H <sub>22</sub> O <sub>12</sub> | 537.1034                                                 | -0.73             | 11.55    | 2             |
| 16   | Salvianolic acid B /Salvianolic acid L isomer II <sup>a, 3</sup>  | C <sub>36</sub> H <sub>30</sub> O <sub>16</sub> | 717.1456                                                 | -0.58             | 11.63    | 2             |
| 17   | Herniarin <sup>c, 7</sup>                                         | C <sub>10</sub> H <sub>8</sub> O <sub>3</sub>   | 175.0389                                                 | -1.83             | 12.51    | 2             |
| 18   | Methylrosmarinic acid isomer I <sup>a, 3</sup>                    | C <sub>19</sub> H <sub>18</sub> O <sub>8</sub>  | 373.0921                                                 | 1.14              | 12.56    | 2             |
| 19   | Salvianolic acid A isomer IV <sup>a, 3</sup>                      | C <sub>26</sub> H <sub>22</sub> O <sub>10</sub> | 493.1129                                                 | -0.82             | 13.1     | 2             |
| 20   | Salvianolic acid B /Salvianolic acid L isomer III <sup>a, 3</sup> | C <sub>36</sub> H <sub>30</sub> O <sub>16</sub> | 717.1456                                                 | -0.59             | 13.16    | 2             |
| 21   | Luteolin <sup>b</sup>                                             | C <sub>15</sub> H <sub>10</sub> O <sub>6</sub>  | 285.0393                                                 | 0.55              | 13.97    | 1             |
| 22   | Methylrosmarinic acid isomer III <sup>a, 3</sup>                  | C <sub>19</sub> H <sub>18</sub> O <sub>8</sub>  | 373.0921                                                 | 0.98              | 13.97    | 2             |
| 23   | Melitric acid B <sup>a, 3</sup>                                   | C <sub>27</sub> H <sub>20</sub> O <sub>11</sub> | 519.0922                                                 | -0.63             | 14.3     | 2             |
| 24   | Salvianolic acid B / Salvianolic acid L isomer IV <sup>a, 3</sup> | C <sub>36</sub> H <sub>30</sub> O <sub>16</sub> | 717.1456                                                 | -0.50             | 14.34    | 2             |
| 25   | Salvianolic acid F isomer I <sup>a, 3</sup>                       | C <sub>17</sub> H <sub>13</sub> O <sub>6</sub>  | 313.0712                                                 | 1.61              | 14.6     | 2             |
| 26   | Salvianolic acid F isomer II <sup>a, 3</sup>                      | C <sub>17</sub> H <sub>13</sub> O <sub>6</sub>  | 313.0712                                                 | 0.15              | 15.26    | 2             |

\*Metabolite standards initiative metabolite identification (MSI MI) levels. Reference standards were available for all compounds identified at MSI MI level 1. Class of compounds: <sup>a</sup>Phenolic acids; <sup>b</sup>Flavonoids; <sup>c</sup>Coumarin derivative; <sup>d</sup>Hydroxybenzaldehydes. Results expressed as equivalents of gallic acid (1), protocatechuic acid (2), rosmarinic acid (3), quercetin (4), luteolin (5), catechin (6), *p* -coumaric acid (7).

**Table S2.** Summary of HPLC-HRMS criterion for quantification of phenolics in *Thymus lotocephalus* López and Morales extracts.

| Compound                 | Linear range (mg/L) | Intercept | Slope   | R <sup>2</sup> | LOD (µg/L) | LOQ (µg/L) |
|--------------------------|---------------------|-----------|---------|----------------|------------|------------|
| Epigallocatechin gallate | 3.12-50             | -69150    | 21667   | 0.9976         | 228.13     | 760.46     |
| Caffeic acid             | 0.05-8              | 209431    | 5791726 | 0.9999         | 0.95       | 3.16       |
| Protocatechuic acid      | 0.05-10             | 150321    | 2058784 | 0.9995         | 3.92       | 13.06      |
| Gallic acid              | 0.1-50              | 124985    | 3119019 | 0.9993         | 1.38       | 4.60       |
| <i>p</i> -Coumaric acid  | 0.5-6               | 2090      | 84084   | 0.9979         | 43.91      | 146.38     |
| Luteolin                 | 0.03-91             | 7840120   | -158687 | 0.9997         | 0.60       | 2.00       |
| Quercetin                | 0.1-3.12            | -1347970  | 9918400 | 0.9975         | 0.10       | 0.33       |
| Catechin                 | 0.8-25              | -632768   | 2024864 | 0.9994         | 3.25       | 10.82      |
| Rosmarinic acid          | 0.10-80             | -2568152  | 1567304 | 0.9917         | 30.11      | 100.38     |

**Table S3.**  $EE(\lambda) \times I(\lambda)$  constants used in the determination of SPF for each wavelength (Sayre et al., 1979)

| Wavelength $\lambda$ (nm) | $EE(\lambda) \times I(\lambda)$ |
|---------------------------|---------------------------------|
| 290                       | 0.0150                          |
| 295                       | 0.0817                          |
| 300                       | 0.2874                          |
| 305                       | 0.3278                          |
| 310                       | 0.1864                          |
| 315                       | 0.0837                          |
| 320                       | 0.0180                          |

$EE(\lambda)$ : erythral effect spectrum;  $I(\lambda)$ : solar intensity spectrum.
